## Arterial and Ventricular CSF Pharmacokinetics after Intrathecal Meperidine in Humans

Pierre Maurette, M.D.,\* Patrick Tauzin-Fin, M.D.,† Gerard Vinçon, Ph.D.,‡ Annick Brachet-Lierman, M.D.‡

In order to investigate the mechanisms leading to respiratory depression after lumbar administration of opioids, plasma and ventricular CSF pharmacokinetics of intrathecal meperidine ( $1 \text{ mg} \cdot \text{kg}^{-1}$ ) were studied in five head-injured patients undergoing surgery for lower limb fracture. Meperidine was detected both in the plasma (arterial catheter) and in the ventricular CSF (intracranial catheter) soon after intrathecal administration:  $45 \pm 17 \text{ min}$  and  $100 \pm 14 \text{ min}$ , respectively. The maximal plasma concentration was  $341 \pm 133 \text{ ng} \cdot \text{ml}^{-1}$ , whereas, in ventricular CSF, it was  $64.5 \pm 14.9 \text{ ng} \cdot \text{ml}^{-1}$ . The ventricular CSF-plasma ratio increased with time ( $r = 0.82$ ) from  $0.18 \pm 0.04$  at the first hour to  $0.38 \pm 0.1$  at 16th hour. It is concluded that the putative risk of respiratory depression appears to be mainly related to the absorption into the systemic circulation and to redistribution back into CSF. (Key words: Anesthetics, opioid: meperidine. Anesthetic techniques, spinal: meperidine. Pharmacokinetics: meperidine.)

A DRUG IS CONSIDERED a local anesthetic if it can consistently and without toxicity block in a reversible manner both sensory and motor pathways. Intrathecal meperidine seems to fulfill these requirements.<sup>1,2</sup> Initially used in animals in 1978,<sup>3</sup> it later appeared useful for management of cancer pain in humans.<sup>4</sup> More recently, high doses of intrathecal meperidine have been used as a sole anesthetic for urologic surgery and surgery of the lower limbs,<sup>5,6</sup> combining two advantages. First, in the operative period, it induces a motor block.<sup>2,5,7</sup> Second, long-lasting and effective pain relief is present both intra- and postoperatively. However intrathecal opioids can induce respiratory depression. Although this complication is more commonly observed following intrathecal administration of hydrophilic drugs, such as morphine, rather than after lipophilic agents injection, such as meperidine or fentanyl,<sup>8</sup> the fact that the mechanisms of this depression remain unclear<sup>9</sup> limits the use of such a technique. It has been suggested<sup>10</sup> that three mechanisms might account for the access of the opioid to brain stem respiratory centers: 1) rostral movement in the CSF, 2) vascular absorption followed by

an intraventricular choroid plexus secretion, and 3) movement up Batson's perivertebral plexus.<sup>11</sup> The relative role of each of those mechanisms has not been precisely investigated mainly for ethical considerations. Whereas plasma kinetics following intrathecal injection of meperidine are now well documented,<sup>12,13</sup> CSF kinetics following intrathecal administration have not been extensively studied and data on its lumbar absorption only are available.<sup>14,15</sup>

This study was thus designed to compare plasma and ventricular CSF pharmacokinetics of meperidine after lumbar intrathecal injection of  $1 \text{ mg} \cdot \text{kg}^{-1}$  in humans to further enhance understanding of the mechanisms leading to both respiratory depression and pain relief.

### Materials and Methods

The study was approved by the Ethics Committee of the Medical Faculty of Bordeaux and the informed consent of the patient's guardian was obtained.

### PATIENT SELECTION

Since 1984, intracranial pressure monitoring by means of a ventricular catheter has been carried out in 256 patients referred to the trauma center of the Teaching Hospital of Bordeaux and suffering from severe head injury. Of this group, five patients required surgery for lower limb injuries between the 5th and the 10th day following injury and once the clinical status and the intracranial pressure allowed such surgery. The operation was performed just before removal of both the intraventricular and arterial catheters. In order to avoid a change in level of consciousness, spinal anesthesia was used. Patient data on the day of surgery are listed in table 1.

### ANESTHETIC TECHNIQUE

Neuroprotective medication was stopped at least 48 h prior to operation. At that time, the trachea of each patient was intubated, and the patients spontaneously breathed a gas mixture with an  $\text{FI}_{\text{O}_2}$  sufficient to maintain normal arterial oxygenation. Spinal anesthesia was performed at L3/4 interspace without preanesthetic medication and after an intravenous infusion of 300–500 ml of colloid solution. Two ml of CSF were used for bacteriological and biochemical controls. One  $\text{mg} \cdot \text{kg}^{-1}$  of meperidine (2 ml vial containing 100 mg, density =  $1.014 \text{ g} \cdot \text{ml}^{-1}$ ) was then injected without barbotage, over ap-

\* Assistant Professor in Anesthesiology, Département d'Anesthésie Réanimation I, Groupe Hospitalier Pellegrin.

† Staff Specialist in Anesthesiology.

‡ Assistant Professor in Clinical Pharmacology, Département de Pharmacologie Clinique, Groupe Hospitalier Pellegrin.

Received from the Département d'Anesthésie and the Département de Pharmacologie Clinique, Groupe Hospitalier Pellegrin, 33076 Bordeaux Cedex, France. Accepted for publication January 29, 1989. Presented at the 1988 Annual Meeting of the American Society of Anesthesiologists, October, 1988, San Francisco, California.

Address reprint requests to Dr. Maurette: département d'Anesthésie-Réanimation I, Groupe Hospitalier Pellegrin, 33076 Bordeaux cedex, France.

TABLE 1. Patient Data on the Surgical Day

| Patient | Age/Sex<br>(year) (M/F) | Body Weight/Temp.<br>(kg) (°C) | ICP<br>mmHg | GCS | Delay from<br>Trauma (day) | Nature of Brain<br>Trauma | Surgery                       |
|---------|-------------------------|--------------------------------|-------------|-----|----------------------------|---------------------------|-------------------------------|
| 1       | 19 M                    | 75 38°2                        | 8           | 7   | 8                          | Contusion                 | Burn Excision                 |
| 2       | 18 F                    | 56 38°5                        | 8           | 8   | 10                         | Contusion                 | Pinning of Femur              |
| 3       | 28 M                    | 76 38°4                        | 12          | 6   | 7                          | Brain Swelling            | Pinning of Femur              |
| 4       | 63 M                    | 74 37°9                        | 5           | 6   | 4                          | Brain Anoxia              | Wound Dressing                |
| 5       | 24 M                    | 66 38°4                        | 8           | 8   | 7                          | Contusion                 | Pinning of<br>Metatarsal Bone |

ICP = intracranial pressure; GCS = Glasgow Coma Scale.

proximately 30 s through a 25 G needle and with the patient in the lateral decubitus position. Patients were then positioned supine with trunk and head tilted up 15°. Perioperative hydration was carried out with lactated Ringer solution (15 ml · kg<sup>-1</sup>). Blood replacement was not required as blood loss was slight. Intra- and postoperative monitoring included ECG, blood pressure, and end-tidal CO<sub>2</sub> which were continued throughout a 24 h postsurgery period, during which time the trunk was maintained in a constant position while the legs were slightly elevated.

#### PHARMACOKINETICS

Blood samples were withdrawn into heparinized tubes via the arterial catheter every 2 h up to the 16th hour. Additional determinations were obtained every 15 min during the first hour and at the end of the second hour. Plasma was separated by centrifugation, and stored at -20° C. Meperidine was assayed by gas chromatography with azote phosphorus flame ionization detection (NPFID). Plasma (or CSF) were alkalized, extracted, and centrifuged. An aliquot of the organic layer was applied to an OV 1 column. The detection limit of the

method was 3 ng · ml<sup>-1</sup> and the coefficient of variation was 2.5%. Two ml of ventricular CSF samples were taken from the indwelling catheter (dead space 0.2 ml) at the end of the first and second hour and then every 2 h up to the 16th hour after administration. The following pharmacokinetic parameters were computed: C<sub>max</sub> (ng · ml<sup>-1</sup>)—observed peak plasma concentration; T<sub>max</sub> (h)—time to C<sub>max</sub> (observed value); and t<sub>1/2el</sub>—elimination half-life (0.693 · β<sup>-1</sup>) where β is the slope of the terminal phase of the linear relationship determined by means of the least squares method between log values of actual concentration and time.

The results are presented as mean ± SEM.

#### Results

In all patients, the clinical course was uneventful over the observation period. No respiratory depression occurred during either the operative period or postoperative period as reflected by abnormal end-tidal CO<sub>2</sub> and PaCO<sub>2</sub> (data not shown). Plasma and ventricular CSF concentration of meperidine *versus* time are shown in table 2.

TABLE 2. Plasma and Ventricular CSF Data

| Patient |        | Time (h) |      |     |      |      |      |      |      |      |      |      |      |
|---------|--------|----------|------|-----|------|------|------|------|------|------|------|------|------|
|         |        | .25      | .50  | .75 | 1    | 2    | 4    | 6    | 8    | 10   | 12   | 14   | 16   |
| 1       | Plasma | 67       | 103  | 106 | 111  | 103  | 99   | 56   | 38   | 25.6 | 17   | 11   | 8    |
|         | VCSF   |          |      |     | 25   | 515  | 49.7 | 35   | 25   | 15   | 7.2  | 5.7  | 3    |
|         | Ratio  |          |      |     | 0.22 | 0.5  | 0.5  | 0.62 | 0.65 | 0.58 | 0.42 | 0.51 | 0.37 |
| 2       | Plasma | 714      | 326  | 491 | 235  | 186  | 73   | 51   | 27   | 9    | ND   | ND   | ND   |
|         | VCSF   |          |      |     | 45.8 | 30.8 | 13.7 | 6.3  | 3.2  | ND   | ND   | ND   | ND   |
|         | Ratio  |          |      |     | 0.19 | 0.16 | 0.18 | 0.12 | 0.11 |      |      |      |      |
| 3       | Plasma | 170      | 180  | 195 | 180  | 170  | 140  | 110  | 71   | 52   | 37   | 25   | 20   |
|         | VCSF   |          |      |     | 48   | 44   | 23   | 11   | 7.7  | 6    | ND   | ND   | ND   |
|         | Ratio  |          |      |     | 0.26 | 0.26 | 0.16 | 0.1  | 0.1  | 0.1  |      |      |      |
| 4       | Plasma | M        | M    | M   | M    | 310  | 192  | 129  | 70   | 39   | 18   | 14   | 6    |
|         | VCSF   |          |      |     | 124  | 120  | 64   | 43   | 26   | 15.5 | 9.7  | 6.4  | 3.3  |
|         | Ratio  |          |      |     |      | 0.38 | 0.33 | 0.34 | 0.37 | 0.39 | 0.53 | 0.45 | 0.55 |
| 5       | Plasma | 87.5     | 139  | 236 | 346  | 320  | 206  | 179  | 122  | 87.5 | 65   | 37   | 23   |
|         | VCSF   |          | 10.7 |     | 26.7 | 53   | 49.5 | 44.2 | 35   | 21.7 | 13   | 8    | 5    |
|         | Ratio  |          |      |     | 0.07 | 0.16 | 0.24 | 0.24 | 0.28 | 0.25 | 0.2  | 0.21 | 0.21 |

Individual concentrations (ng · ml<sup>-1</sup>) of meperidine in the plasma and ventricular CSF according to the duration of the postoperative period.

M = value missing; ND = value not detectable.

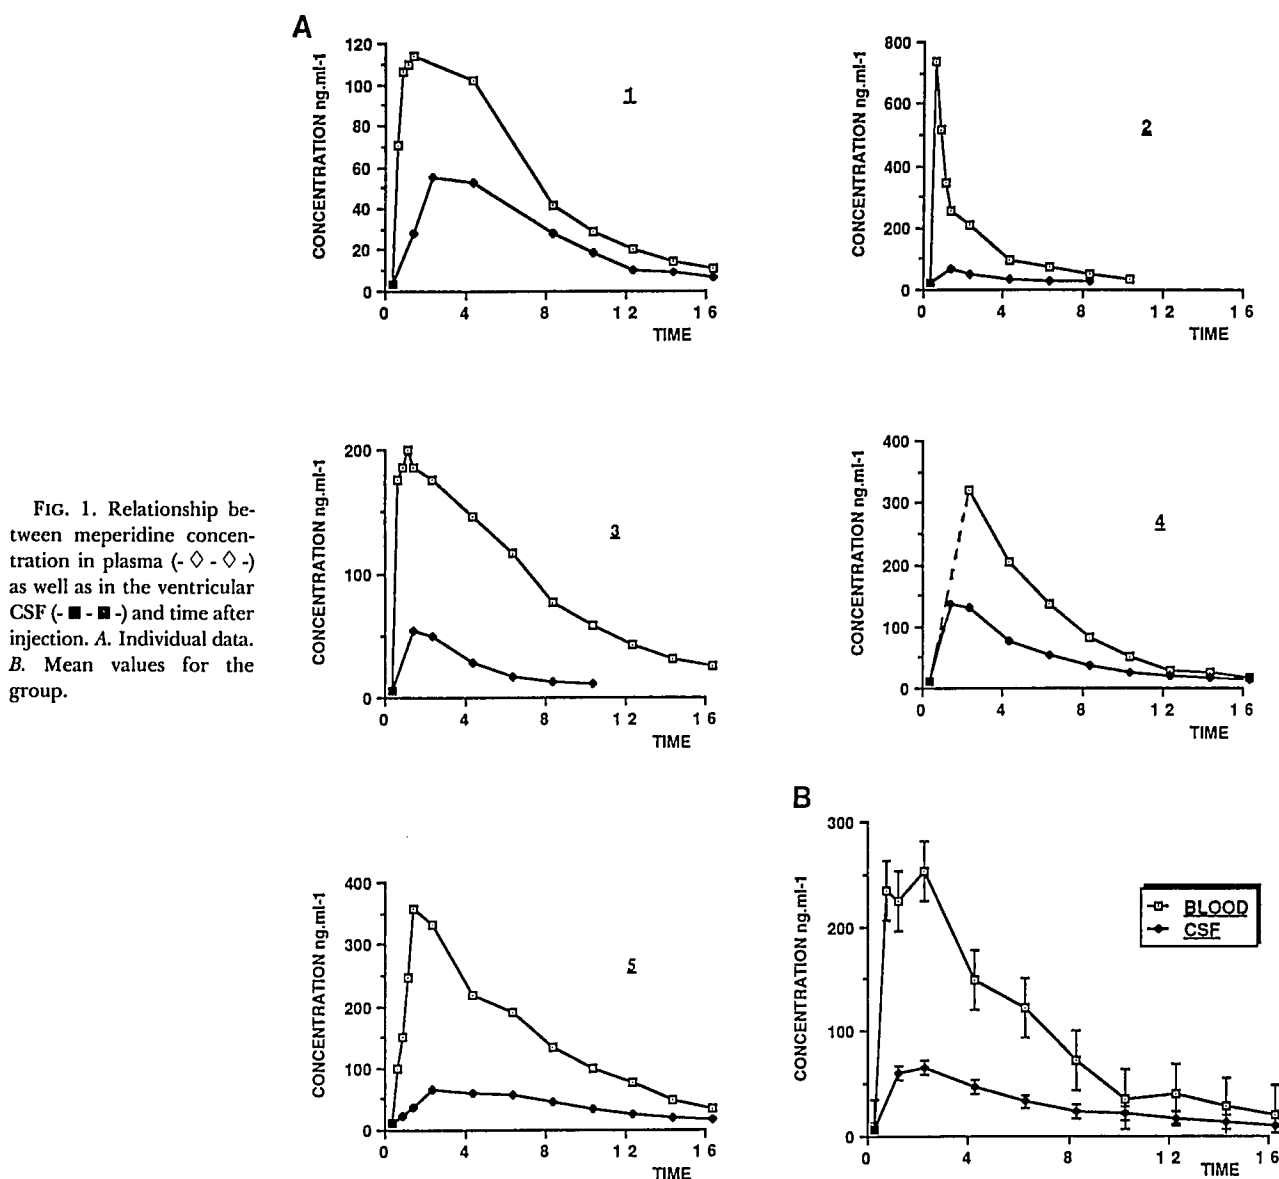

#### PLASMA KINETICS

Figure 1 shows the concentrations of meperidine in the plasma and in the ventricular CSF in each patient (fig. 1A). Mean results for the group are also presented (fig. 1B). Absorption from lumbar CSF was rapid, and the peak plasma concentration was observed at  $45 \pm 17$  min after

administration. Unfortunately, early samples for patient 4 were omitted and thus  $C_{max}$  and  $T_{max}$  could not be determined for this patient. Moreover, there was considerable interindividual variability in the extent of absorption ( $C_{max}$  ranging from 111 to  $714 \text{ ng} \cdot \text{ml}^{-1}$ ). Table 3 shows individual pharmacokinetic data.

TABLE 3. Plasma Kinetics Data

| Patient                                    | 1    | 2    | 3    | 4    | 5    | Mean | SEM  |
|--------------------------------------------|------|------|------|------|------|------|------|
| C max ( $\text{ng} \cdot \text{ml}^{-1}$ ) | 111  | 714  | 195  | —    | 346  | 341  | 133  |
| T max (h)                                  | 1    | 0.25 | 0.75 | —    | 1    | 0.45 | 0.28 |
| T1/2 el (h)                                | 3.33 | 1.97 | 4.16 | 2.49 | 3.73 | 3.14 | 0.4  |

Individual plasma kinetics data and mean values: elimination half-life ( $T_{1/2}$  el), maximum concentration and time to reach maximum concentration ( $C_{max}$ ,  $T_{max}$ ). Note that  $C_{max}$  and  $T_{max}$  in patient 4

were not determined (see text and table 2) and thus mean  $\pm$  SEM values are computed for the remaining four patients.

TABLE 4. Ventricular CSF Kinetics Data

| Patient                        | 1    | 2    | 3    | 4    | 5    | Mean | SEM  |
|--------------------------------|------|------|------|------|------|------|------|
| C max (ng · ml <sup>-1</sup> ) | 51.5 | 45.8 | 48   | 124  | 53   | 64.5 | 14.9 |
| T max (h)                      | 2    | 1    | 1    | 1    | 2    | 1.4  | 0.24 |
| T 1/2 el (h)                   | 2.67 | 1.77 | 2.69 | 2.75 | 3.72 | 2.72 | 0.3  |

Individual ventricular CSF kinetics data. Headings are similar to those in table 3.

### VENTRICULAR CSF KINETICS

As shown in figure 1, meperidine was detected in the first ventricular CSF sample withdrawn 1 h after lumbar administration. In patient 2, 3, and 4, values given as T<sub>max</sub> are not actual T<sub>max</sub> but, rather, maximal values determined according to the protocol. The peak concentration was observed  $1.4 \pm 0.24$  h after injection. Table 4 summarizes individual pharmacokinetic data and mean values for the group.

### PLASMA AND VENTRICULAR CSF PHARMACOKINETICS COMPARISON

In figure 2 are plotted ventricular CSF-plasma concentration ratios *versus* times. The linear regression equation was ventricular CSF/blood =  $0.16 + 0.017$  time, showing that the ratio increased with time ( $r = 0.82$ ) from a value of  $0.18 \pm 0.04$  at the first hour to  $0.38 \pm 0.1$  at 16th hour.

### Discussion

These results show that meperidine is detectable in ventricular CSF at the first hour after intrathecal administration, the concentration being, however,  $1/3$  to  $1/5$  that found in the plasma.

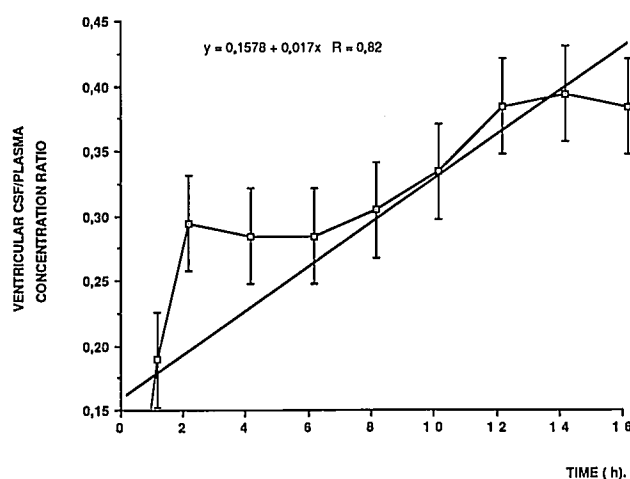

FIG. 2. Relationship between ventricular CSF-plasma concentration ratio of meperidine and time after injection. Data are given as mean. Vertical bars indicate SEM. The linear regression is also shown.

It could be argued that these results obtained in patients with severe head injury might not be relevant to patients without cranial pathology. However, the clinical course estimated from the Glasgow coma scale was favorable in all patients. Moreover, the results of the sequential CT scans, the rapid decrease of intracranial pressure to normal value, and the biochemical features of the CSF suggest that the intracranial pressure-volume relationship of these patients was within a normal range on the day of the operation.<sup>16</sup> Furthermore, the same investigators found that absorption and CSF production were only slightly altered in patients suffering from similar injury and at this same interval after injury.<sup>17</sup> Additionally, physiologic studies in animals have shown that a variation in the hydrostatic pressure ranging from  $-10$  to  $30$  cm water had no significant effect on the rate at which CSF is produced.<sup>18</sup> Thus, one can assume that the results of the present study are not relevant to only head-injured patients.

It is unlikely that the removal of samples of ventricular CSF altered the movement of CSF within the ventricular and spinal system and, thus, the rate of spread of meperidine. As discussed above, it is reasonable to assume that CSF production in these patients was within a normal range (*i.e.*,  $0.3$ – $0.4$  ml · min<sup>-1</sup>).<sup>19</sup> Consequently, throughout the study, about 300 ml of CSF were produced, whereas only ten samples of 2 ml were withdrawn. This represents about 0.6% of the CSF produced, which would not significantly change CSF dynamics.<sup>20</sup> Similarly, the bulk flow of meperidine depends on the position. In our study, a 15° head-up position was selected, as it is the one currently recommended for spinal anesthesia with opioids.<sup>21</sup> We doubt that such a position played a major role in the observed results, although its effect would require further investigation.

The absorption of meperidine into plasma observed in this study is in good agreement with data previously reported in the literature. This lipophilic drug is rapidly and widely absorbed.<sup>22</sup> However, a considerable inter-individual variation was noted: a sevenfold variation in the present study, while a 12-fold variation was reported after epidural injection.<sup>14</sup> It should be noted that, in this study, plasma concentrations were higher than those reported by others using the same intrathecal dose.<sup>12,13</sup> The fact that our patients had a rectal temperature higher than 38° C could have increased vascular absorption *via*

an increase of the local blood flow. However this effect of temperature on vascular absorption is certainly slight, as cardiac output only increases about  $400 \text{ ml} \cdot \text{min}^{-1}$  for this level of hyperpyrexia.<sup>23</sup> Moreover, Rowell<sup>24</sup> has shown that medular blood flow is protected from changes in the cardiac output. Age and gender are important factors involved in vascular absorption and in the amount of lipid present. Variations in these factors might account for the differences observed among those studies.<sup>25,26</sup> Incidentally, it should be noted that the only woman, the youngest in the group (table 1), had both the highest temperature at operation and the highest plasma level of meperidine ( $714 \text{ ng} \cdot \text{ml}^{-1}$ , 15 min after injection). Apart from this value, all the other values were below levels ( $400\text{--}500 \text{ ng} \cdot \text{ml}^{-1}$ ) required for systemic analgesia.<sup>27,28</sup>

The fact that meperidine is a lipophilic narcotic explains both the fact that spinal cord receptors are rapidly occupied permitting such surgery as well as the rapid systemic uptake. It is thus not surprising that elimination half-life values found in our group are in agreement with the pharmacokinetic characteristics of meperidine after both intravascular and intramuscular administration.<sup>28,29</sup>

We observed that meperidine appears in ventricular CSF soon after lumbar administration, suggesting at least initially diffusion from blood rather than movement *via* CSF. It was reported that the bulk movement of CSF from the lumbar space into the cisterna magna occurred within a 3–6-h interval.<sup>30,31</sup> That initial meperidine concentration in CSF was due to diffusion from blood would be further supported when comparing the time course of meperidine concentration in ventricular CSF and blood. Both curves were similar in each patient and  $T_{\text{max}}$  was reached in CSF after it was reached in the blood. Thus, the blood-brain barrier does not appear to play a major role in meperidine diffusion between CSF and blood. It has already been shown that diffusion occurs in choroid plexus<sup>32,33</sup> and several investigators have demonstrated that passive diffusion was the source of the opioid movement from blood to lumbar CSF.<sup>34–36</sup> As the free fraction of meperidine in blood ranges from 20 to 40%<sup>28</sup> and, as suggested recently, 60% of the total,<sup>37</sup> the meperidine concentration in the CSF we measured in our patients may well reflect diffusion of free drug component from blood into the ventricular CSF. Additionally, our results confirm those of Boreus *et al.*<sup>34</sup> These authors reported that, when injected intramuscularly, meperidine appeared rapidly in lumbar CSF. These results were interpreted as being in agreement with the concept that the concentration of a drug in the lumbar CSF is correlated with that in the blood at equilibrium. The fact that the ventricular CSF-plasma concentration ratio was correlated with time suggests that a steady state was not achieved in the present study, unlike the study by Boreus *et al.* Several mechanisms might account for this fact: 1) the route of meperidine

administration was different in the two studies, 2) it could also be argued that ventricular CSF-plasma concentration ratio increased with time (fig. 2) partially because of an upward migration from the lumbar injection site,<sup>31</sup> and 3) Hug<sup>38</sup> has shown that active transport by choroid plexus is able to concentrate narcotics *in vitro*.

Further studies are required in order to confirm these hypotheses. This also highlights the difficulties found in comparing pharmacokinetics data when compartment theory cannot be applied with confidence.<sup>8</sup>

From a practical point of view, these results suggest that the levels of meperidine in the ventricular CSF are directly related to those in the plasma and consequently to the magnitude of absorption. Although these levels are, in most cases, not sufficient to induce systemic analgesia,<sup>27,28</sup> they may be responsible for the generalized side effects of the drug, *i.e.*, pruritis, drowsiness, vomiting.<sup>39</sup> The respiratory depression may derive from the high plasma level. It has been reported that when meperidine is administered intravenously, respiratory depression occurs following circulating levels around  $500 \text{ ng} \cdot \text{ml}^{-1}$ <sup>40</sup> to  $800 \text{ ng} \cdot \text{ml}^{-1}$ ,<sup>29</sup> depending on the injection technique. This would indicate that the safety margin of the dose used in this study ( $1 \text{ mg} \cdot \text{kg}^{-1}$ ) is low, provided that the relationship between respiratory depression and blood concentration is identical whatever the route of administration. Owing to the wide interindividual variation in plasma pharmacokinetics of this agent, the benefit-risk ratio of this technique is not very high. Particular attention is thus needed during the first hours after both intrathecal or epidural anesthesia, especially if reinjections are required.<sup>41–43</sup>

The authors wish to thank Dr. Roger Marthan for his skillful assistance.

## References

1. Way EL: Studies on the local anaesthetic properties of isoniphepaine. *J Am Pharmacol Assoc* 35:44–47, 1946
2. Dawes GS: Synthetic substitutes for quinidine. *Br Med J* 12:43–45, 1946
3. Yaksh TL: Analgesic action of intrathecal opiates in cats and primates. *Brain Res* 153:205–210, 1978
4. Cousins MJ, Mather LE, Glynn CJ, Wilson PR, Graham JR: Selective spinal analgesia. *Lancet* i:1141–1142, 1979
5. Famewo CE, Naguib M: Spinal anaesthesia with meperidine as the sole agent. *Can Anaesth Soc J* 32:533–537, 1985
6. Ragot P, Tauzin-Fin P, Crozat R, Fonrouge JM, Sabathie M: Comparaison de la pethidine et de la prilocaïne en rachianesthésie pour 100 interventions urologiques. *Agressologie* 25:29–32, 1984
7. Andrivet P, Ekherian JM, Lienhart A, Viars P: Bloc moteur induit par la pethidine intrarachidienne. Quantification et comparaison avec la lidocaïne. *Ann Fr Anesth Reanim* 6:419–422, 1987
8. Cousins MJ, Mather LE: Intrathecal and epidural administration of opioids. *ANESTHESIOLOGY* 61:276–310, 1984
9. Cousins MJ: Comparative pharmacokinetics of spinal opioids in

- humans: A step towards determination of relative safety. *ANESTHESIOLOGY* 67:875-876, 1987
10. Payne R: CSF distribution of opioids in animals and man. *Acta Anaesthesiol Scand* 85:38-46, 1987
  11. Batson OV: The vertebral vein system. *Am J Roentgenol* 78:195-212, 1957
  12. Naguib M, Famewo CE: Pharmacokinetics of meperidine in spinal anaesthesia. *Can Anaesth Soc J* 33:162-166, 1986
  13. Tauzin-Fin P, Crozat R, Albin H, Brachet-Liermain A, Sabathie M: Pharmacocinétique de la péthidine après rachianesthésie. Implications cliniques. *Ann Fr Anesth Réanim* 6:33-37, 1987
  14. Gourlay GK, Cherry DA, Plummer JL, Armstrong PJ, Cousins MJ: The influence of drug polarity on the absorption of opioid drugs into CSF and subsequent cephalad migration following lumbar epidural administration: Application to morphine and meperidine. *Pain* 31:297-305, 1987
  15. Sjöström S, Tamsen A, Persson P, Hartvig P: Pharmacokinetics of intrathecal morphine and meperidine in humans. *ANESTHESIOLOGY* 67:889-895, 1987
  16. Maset AL, Marmarou A, Ward JD, Choi S, Lutz HA, Brooks D, Moulton RJ, Desalles A, Mrizebar JP, Turner H, Young HF: Pressure volume index in head injury. *J Neurosurg* 67:832-840, 1987
  17. Marmarou A, Maset AL, Ward JD, Moulton RT, Lutz HA, Clifton GL, Becker DP: Dynamics of intracranial pressure rise in severely head injured patients, Intracranial Pressure VI. Edited by Miller JD, Teasdale GM, Rowan JO, Galbraith SL, Mendelow AD. Berlin, Springer Verlag, 1986, pp 9-14
  18. Heisey SR, Held D, Pappenheimer JR: Bulk flow and diffusion in the cerebro spinal fluid system of the goat. *Am J Physiol* 203:775-781, 1962
  19. Reynolds FJM: Spinal and epidural block, *A Practice of Anesthesia*. Edited by Wylie WD. London, Churchill-Davidson H.C., Lloyd-Luke Ltd, 1984, pp 856-892
  20. Rieselbach RE, Di Chiro G, Freireich E, Rall DP: Subarachnoid distribution of drugs after lumbar injection. *N Engl J Med* 25:1273-1278, 1962
  21. Samii K, Ferret J, Harari A, Viars P: Selective spinal analgesia. *Lancet* I, 1142, 1979
  22. Gustafsson LL, Schildt B, Jacobsen K: Adverse effects of extradural and intrathecal opiates: Report of a nationwide survey in Sweden. *Br J Anaesth* 54:479-486, 1982
  23. Guyton AC, Jonnes CE, Coleman TG: Cardiac output and its regulation, *Circulatory Physiology*. Philadelphia, WB Saunders Company, 1973, pp 1-19
  24. Rowell LB: Cardiovascular aspect of human thermoregulation. *Circ Res* 52:367-379, 1983
  25. Holmberg L, Odar-Cederlof I, Boreus LO, Heyner L, Ehrnebo M: Comparative disposition of pethidine norpethidine in old and young patients. *Eur J Clin Pharmacol* 22:175-179, 1982
  26. Jacobsen J, Flachs H, Dich-Nielsen JO, Rosen J, Larsen AB, Hvidberg EF: Comparative plasma concentration profiles after IV, IM and rectal administration of pethidine in children. *Br J Anaesth* 60:623-626, 1988
  27. Stapleton JV, Austin KL, Mather LE: A pharmacokinetic approach to post-operative pain: Continuous infusion of pethidine. *Anaesth Intensive Care* 7:25-32, 1979
  28. Edwards DJ, Svensson CK, Visco JP, Lalka D: Clinical pharmacokinetics of pethidine: 1982. *Clin Pharmacokinet* 7:421-433, 1982
  29. Mather LE, Meffin PJ: Clinical pharmacokinetics pethidine. *Clin Pharmacokinet* 3:352-368, 1978
  30. Dichiro G: Movement of the cerebrospinal fluid in human being. *Nature* 204:290-291, 1964
  31. Dichiro G: Observations on the circulation of the cerebrospinal fluid. *Acta Radiol Diagnos* 5:988-1002, 1966
  32. Hochwald GM: Cerebrospinal fluid mechanisms, *Anesthesia and Neurosurgery*. Edited by Cottrel J, Turndorf H. Saint Louis, C.V. Mosby Company, 1986, pp 33-53
  33. Cserr HF: Physiology of the choroid plexus. *Physiol Rev* 51:27-31, 1971
  34. Boreus LO, Skoldefors E, Ehrnebo M: Appearance of pethidine and norpethidine in cerebrospinal fluid of man following intramuscular injection of meperidine. *Acta Anaesthesiol Scand* 27:222-225, 1983
  35. Mather LE, Pavlin EG: Tranfert of Pethidine to CSF following intravenous administration. *Anaesth Intensive Care* 9:205-207, 1981
  36. Tamsen A, Sakurada T, Wahlstrom A, Terenius L, Hartvig P: Post-operative demand for analgesics in relation to individual levels of endorphins and substance P in cerebrospinal fluid. *Pain* 13:171-183, 1982
  37. La Rosa C, Morgan DJ, Mather LE: Pethidine binding in whole blood: methodology and clinical significance. *Br J Clin Pharmacol* 17:405-409, 1984
  38. Hug CC: Transport of narcotic analgesics by choroid plexus and kidney tissue in vitro. *Biochem Pharmacol* 16:345-359, 1967
  39. Yaksh TL: Spinal opiate analgesia: Characteristics and principles of action. *Pain* 11:293-346, 1981
  40. Rigg JRA, liley AH, Vedig AE: Relationship of ventilatory depression to steady-state blood pethidine concentration. *Br J Anaesth* 53:613-619, 1981
  41. Scott DB, Mc Clure J: Selective epidural analgesia. *Lancet* I: 1410-1411, 1979
  42. Gustafsson LL, Post C, Edvardsen B, Ramsay CH: Distribution of morphine and meperidine after intrathecal administration in rat and mouse. *ANESTHESIOLOGY* 63:483-489, 1985
  43. Brownridge P, Wrobel J, Watt-Smith J: Respiratory depression following accidental subarachnoid pethidine. *Anaesth Intensive Care* 11:237-240, 1983
